# 1 Depressive and anxiety symptoms and COVID-19-related factors among men 2 and women in Nigeria

3

4 Olakunle Ayokunmi Oginni<sup>1,2,\*†‡</sup>, Ibidunni Olapeju Oloniniyi<sup>1,2†</sup>, Olanrewaju Ibigbami<sup>1,2†</sup>,  
5 Victor Ugo<sup>3</sup>, Ayomipo Amiola<sup>2</sup>, Adedotun Ogunbajo<sup>4</sup>, Oladoyin Esan<sup>2</sup>, Aderopo Adelola<sup>2</sup>,  
6 Oluwatosin Daropale<sup>5</sup>, Matthew Ebuka<sup>2</sup>, Boladale Mapayi<sup>1,2</sup>

7

8 <sup>1</sup>Department of Mental Health, Obafemi Awolowo University, Ile-Ife, Nigeria

9 <sup>2</sup>Mental Health Unit, Obafemi Awolowo University Teaching Hospitals Complex, Ile-Ife,  
10 Nigeria

11 <sup>3</sup>Mentally Aware Nigeria Initiative and Senior Campaign Officer, United for Global Mental  
12 Health. London, United Kingdom

13 <sup>4</sup>Department of Epidemiology, Harvard T.H. Chan School of Public Health, Boston, MA,  
14 United State of America

15 <sup>5</sup>Health Centre, Joseph Ayo Babalola University, Ikeji, Osun, Nigeria.

16 \*Corresponding author

17 Email: [kaoginni@yahoo.co.uk](mailto:kaoginni@yahoo.co.uk) (OAO)

18

19 <sup>†</sup>These authors equally conceptualised the study and the analytic plan. <sup>‡</sup>This author led the  
20 analyses and drafted the initial manuscript. All authors equally contributed to the critical  
21 revision of the final manuscript for important intellectual content and approved the final  
22 version.

23 We acknowledge Prof. M. Folayan for her suggestions to improve the manuscript and we  
24 thank the study participants.

## 25 Abstract

26 Despite the greater adverse economic impacts in low and middle-income (LAMI)  
 27 compared to high-income countries, fewer studies have investigated the associations between  
 28 COVID-19-related stressor and mental health in LAMI countries. The objectives of this study  
 29 were to determine the associations between COVID-19-related stressors and anxiety and  
 30 depressive symptoms while controlling for known risk and protective factors and to  
 31 investigate any sex differences. An online survey was carried out to assess sociodemographic,  
 32 psychosocial (previous mental health conditions, sexual orientation, intimate partner violence  
 33 and perceived social support) and COVID-19-related variables. Hierarchical linear regression  
 34 was carried out with anxiety and depressive symptoms as separate outcomes. Of the COVID-  
 35 19-related factors, testing positive for COVID-19 infection, having COVID-19 symptoms,  
 36 having other medical conditions, self-isolating due to COVID-19 symptoms, worry about  
 37 infection, perception of the pandemic as a threat to income and isolation during the lockdown  
 38 were significantly associated with higher anxiety and depressive symptoms. Of these, worry  
 39 about infection, isolation during lockdown and disruption due to the pandemic retained  
 40 independent associations with both outcomes. The variance in anxiety and depressive  
 41 symptoms explained by COVID-19-related factors was larger in women (6.1% and  
 42 respectively) compared to men (6.1% and respectively). COVID-19-related stressors are  
 43 associated with higher anxiety and depressive symptoms, with these effects being larger in  
 44 men compared to women. Enhancing social support can be an affordable strategy to mitigate  
 45 this risk but this needs to be investigated using appropriate designs.

46 Keywords: COVID-19, pandemic, anxiety, depression, mental health, Nigeria

## 47 Introduction

48           The adverse mental health impacts of coronavirus disease of 2019 (COVID-19) are  
49 being increasingly recognized and these include higher rates of depressive and anxiety  
50 symptoms [1, 2]. Several mechanisms have been proposed for these associations including  
51 neurotoxic effects, the evidence for this is limited [3, 4]. These adverse mental health  
52 problems have also been attributed to the adverse psychosocial effects of the pandemic such  
53 as worry about infection – especially among individuals with health conditions associated  
54 with increased risk for severe COVID-19 such as diabetes mellitus and hypertension,  
55 increased social isolation, disruption of social activities, losses of family members and  
56 acquaintances to COVID-19-related mortality and concern about financial instability due to  
57 job losses [5].

58           Alternatively, the increased mental health problems in the context of the COVID-19  
59 pandemic may be partly explained by an exacerbation of pre-existing vulnerabilities rather  
60 than independent effects of pandemic-related stress. For example, the public health measures  
61 put in place to control the spread of COVID-19 - including lockdowns, restricted movement  
62 and social contact, isolation and quarantine - may limit access to mental health services for  
63 individual in treatment which may in turn exacerbate existing mental health problems.  
64 Similarly, the increased tension and frustration resulting from the pandemic and control  
65 measures may drive an increase in the rates of intimate violence victimization [6, 7] which is  
66 independently associated with depressive and anxiety disorders [8]. Sexual minority  
67 individuals, who typically report higher rates of mental health problems including depressive  
68 and anxiety disorders [9-11], may also be exposed to greater harassment and discrimination  
69 by isolating with family members who are unaccepting of their sexual identity [12]. While  
70 these psychosocial vulnerabilities have been shown to be independently associated with  
71 higher psychopathology among Nigerians [11, 13-15], their associations with mental health

72 distress in the context of the COVID-19 pandemic has not been previously investigated in  
73 Nigeria.

74 Furthermore, many studies investigating the mental health impacts of the COVID-19  
75 pandemic have largely focused on the risk factors for adverse mental health outcomes with  
76 little emphasis on protective factors. This is even more important in low and middle-income  
77 countries like Nigeria where mental health coverage and funding are inadequate [16, 17].  
78 Protective factors such as social support [18] may represent a readily available and  
79 inexpensive strategy for promoting mental well-being among Nigerians during the COVID-  
80 19 pandemic.

81 The associations between pandemic-related stressors and adverse mental health  
82 outcomes have been largely investigated in higher-income countries compared to countries in  
83 Africa where the capacities of the governments to cope with the economic impacts of the  
84 pandemic is relatively limited. For example, financial assistance to individuals who had to  
85 stop working due to the restrictions in physical movement in England will be provided for up  
86 to one year [19, 20]. In contrast, the lockdown initiated in Nigeria had to be terminated after  
87 one month as the government could not provide sufficient financial support for individuals  
88 adversely affected [21]. Considering the pre-existing high levels of poverty and  
89 unemployment in Nigeria [21] and reports of adverse impacts of the pandemic on the  
90 Nigerian economy [22, 23], it is likely that the associations between COVID-19-related  
91 stressors and anxiety and depressive symptoms will be consistent with those previously  
92 described in higher-income countries.

93 Lastly, considering the higher rates of anxiety and depressive disorders observed  
94 among women [24] which have been partly attributed to biological and social vulnerabilities  
95 including hormonal influences [25] and gender inequalities [26] respectively; it is important  
96 to investigate whether women in Nigeria are more vulnerable to the adverse impacts of the

COVID-19 pandemic on mental well-being compared to men. This is especially important in sub-Saharan African countries where gender inequality is very high [27] and may have increased during the pandemic [28].

An understanding of the mechanisms of the adverse impacts of the COVID-19 pandemic on mental health can inform strategies to minimize these adverse outcomes. Protective factors can be promoted while identified risk factors can be used to selectively target those at highest risk for preventive or therapeutic interventions. The objectives of this study were, therefore, to identify sociodemographic, psychosocial and COVID-19-related factors associated with anxiety and depressive symptoms among Nigerians in the wake of the COVID-19 pandemic; and to identify sex differences in these relationships. We hypothesized that COVID-related stressors will be independently associated with anxiety and depressive symptoms and that these associations will be stronger in women.

## Materials and methods

This online quantitative survey recruited Nigerians who were at least 18 years old, resident in Nigeria for at least six months prior to the lockdown, fluent in English, able to use the internet and reported no severe cognitive or physical impairments. The survey tool consisted of a participant information page explaining the aims and objectives of the study, an informed consent page, and the survey. The survey was posted on social media including Facebook, Twitter and WhatsApp groups.

The study sample comprised individuals from all parts of Nigeria (Yorubas -70.0%, Igbos – 17.8%, Hausas – 4.5%, and other tribes – 7.6%). Of the 1013 individuals who participated in the study, 43 were excluded due to high levels of missing data while 4 individuals identified as being gender non-binary and were excluded from analyses by sex as their small number precluded further sub-analyses. Ethical approval was obtained from the Ethics and Research Committee of the Institute of Public Health, Obafemi Awolowo

University, Ile-Ife, Nigeria. Online informed consent was obtained from all study participants.

## Measures

The sociodemographic section elicited the sex and age of the participants in years, the highest level of education with options including ‘No qualifications’, ‘Primary school’, ‘Vocational training and equivalents’, ‘Secondary school’ and ‘University’. Marital status was ascertained as ‘Single’, ‘Married’ and ‘Divorced, Separated or widowed’. Employment status categorized as ‘Unemployed/Retired’, ‘Students’ and ‘Employed’. For those who were employed, income was categorized into  $\leq$  ₦40,000 ( $\leq$ USD105), ₦40,001-80,000 (USD105-210), ₦80,001-120,000 (USD210-315), ₦120,001-160,000 (USD315-420) and  $>$  ₦160,000 (USD420) to limit the effect of skewness.

Psychosocial stressors known to be associated with anxiety and depressive symptoms were assessed as follows: A single question was asked about whether the participants had experienced mental health problems prior to the COVID-19 pandemic. Responses were either ‘Yes’ or ‘No’. Participants were asked to indicate their sexual orientation and the responses were categorized as ‘Heterosexual’ and ‘Non-heterosexual’ (comprising ‘Mostly Heterosexual’, ‘Bisexual’, ‘Mostly gay’ and ‘Completely gay’). Intimate Partner violence was assessed using the HARK questionnaire which comprises four questions each screening for past-year physical, sexual and emotional abuse [29]. Each item was scored 0 (No) or 1 (Yes) and the sum of the scores used in subsequent analyses, Cronbach’s alpha in the present study was 0.73. Perceived social support was assessed using the 12-item Multidimensional Scale of Perceived Social Support [30]. Each item was rated on a 7-point Likert scale ranging from 1 (Very strongly disagree) to 7 (Very strongly agree) and total scores derived as a sum of individual responses were used in analyses. Higher scores indicated higher perceived support and Cronbach’s alpha in the present study was 0.97.

Stressors related to the COVID-19 pandemic were assessed using questions adapted from a previous survey [31]. These included whether participants i. had previously tested positive for COVID-19, ii. had had any COVID-19 symptoms, iii. had any medical conditions including hypertension and diabetes mellitus that could increase their risk for COVID-19 infection, iv. had had to self-isolate due to COVID-19 symptoms, v. had close friends who had tested positive for COVID-19, and vi. knew any persons who had died from COVID-19 infection. These were assessed using single questions with ‘Yes’ or ‘No’ responses. Participants’ worry about themselves and their family members becoming infected with COVID-19 was elicited with two separate questions with responses scored on a 5-point Likert scale ranging from ‘*Not worried at all*’ (scored 1) to ‘*Extremely worried*’ (scored 5). Two single questions were asked about whether the participants perceived the COVID-19 pandemic as a threat to income and whether they had felt isolated during the lockdown. These were scored on a Likert scale ranging from 0 (Strongly disagree) to 4 (Strongly agree). Disruption due to the COVID-19 pandemic on domains of life including family, marriage/intimate relationships, parenting, friendships/social life, work, education, recreation, spirituality, community life and physical self-care was assessed by asking participants to indicate how much the pandemic had impacted on each of these domains. Responses for each domain ranged from 1 (Not at all) to 10 (Serious disruption). A total score was computed by summing the individual responses and used in subsequent analyses with higher scores indicating greater disruption; the Cronbach’s alpha in the present study was 0.91.

The outcome variables comprised anxiety and depressive symptoms which were assessed via seven items each from the 14-item Hospital and Anxiety Scale (HADS) [32]. Each item was rated on a 4-point Likert scale ranging from 0 (No, not at all) to 3 (Yes, definitely). Total scores derived for the anxiety and depressive sub-scales by summing the

responses were used in analyses and higher scores indicated more severe symptoms; Cronbach's alphas were 0.81 and 0.64 respectively.

## Analyses

Analyses were carried out using STATA software (vs 14). Data were summarized using proportions, means (and standard deviations) and medians (and interquartile ranges) as appropriate; while sex differences tested using Chi-square test, independent samples t-test and Wilcoxon rank sum test respectively. Univariate associations were investigated using linear regression with anxiety and depressive symptom scores as outcome variables and sociodemographic, COVID-19-related and psychosocial factors as predictor variables. The unstandardized coefficients and their 95% confidence intervals, and the standardized coefficients (beta) were reported. Hierarchical multivariate linear regression models were subsequently specified for anxiety and depressive symptoms as outcome variables respectively while predictor variables included socio-demographic, psychosocial and COVID-19-related variables. These enabled the identification of variables independently associated with anxiety and depressive symptoms. Only variables with univariate associations at  $p < 0.10$  with each outcome were included in the multivariate models. Socio-demographic variables were included in the first step, psychosocial stressors included in the second step and the COVID-19-related variables included in the third step. We reported the change in variance ( $\Delta R^2$ ) of the outcome variable with the addition of each block of variables at each step and the regression coefficients for the final model containing the socio-demographic, psychosocial and COVID-19-related variables. Statistical significance of the change in variance explained was determined using likelihood ratio tests at  $p < 0.05$ . All analyses were carried out in the whole sample and in males and females to determine any sex differences.

## Results

### Descriptive statistics and sex differences



The participants' median age was 29.0 (IQR: 12.0) years with female participants being significantly younger (median: 27.0, IQR: 11.0 years) compared to males (median: 31.0, IQR: 13.0 years; Table 1). Majority (78.7%) had a university qualification with male participants having significantly lower educational qualifications. More respondents were single (61%) and employed (58.1%) with males being more likely to be married and employed ( $\chi^2 = 19.64$  and  $9.70$  respectively,  $p < 0.01$  and  $0.001$  respectively). Of those who were employed, about a third (31.4%) earned a monthly income ranging between ₦41,000 and ₦80,000 (209.2 USD) and these proportions were comparable in both sexes.

**Table 1: Sociodemographic, COVID-19-related and psychosocial factors with sex differences**

| VARIABLES                         | Total sample |       | Male    |       | Female  |       | Statistic                                         |
|-----------------------------------|--------------|-------|---------|-------|---------|-------|---------------------------------------------------|
|                                   | n = 966      | %     | n = 487 | %     | n = 479 | %     | Chi-square/t-<br>test/Wilcoxon<br>signed rank tes |
| SOCIO-DEMOGRAPHIC VARIABLES       |              |       |         |       |         |       |                                                   |
| Age (Median and IQR)              | 29.0         | 12.0  | 31.0    | 13.0  | 27.0    | 11.0  | -7.32*** <sup>b</sup>                             |
| Level of education                |              |       |         |       |         |       |                                                   |
| No qualifications                 | 21           | 2.2   | 14      | 2.87  | 6       | 1.3   | 20.01***                                          |
| Primary School                    | 21           | 2.2   | 13      | 2.67  | 8       | 1.7   |                                                   |
| Vocational and equivalents        | 55           | 5.7   | 40      | 8.21  | 14      | 2.9   |                                                   |
| Secondary school                  | 110          | 11.3  | 46      | 9.45  | 64      | 13.4  |                                                   |
| University                        | 763          | 78.7  | 374     | 76.80 | 387     | 80.8  |                                                   |
| Marital status                    |              |       |         |       |         |       |                                                   |
| Single                            | 592          | 61.0  | 268     | 55.03 | 321     | 67.0  | 19.64***                                          |
| Married                           | 338          | 34.9  | 203     | 41.68 | 135     | 28.2  |                                                   |
| Divorced, Separated or Widowed    | 40           | 4.1   | 16      | 3.29  | 23      | 4.8   |                                                   |
| Employment status                 |              |       |         |       |         |       |                                                   |
| Unemployed/Retired                | 126          | 13.0  | 61      | 12.53 | 65      | 13.6  | 9.70**                                            |
| Student                           | 280          | 28.9  | 120     | 24.64 | 158     | 33.0  |                                                   |
| Employed                          | 564          | 58.1  | 306     | 62.83 | 256     | 53.4  |                                                   |
| Income (₦,000) (n=549)            |              |       |         |       |         |       |                                                   |
| ≤40                               | 110          | 20.04 | 56      | 18.98 | 54      | 21.43 | 1.30                                              |
| 41-80                             | 178          | 32.42 | 94      | 31.86 | 83      | 32.94 |                                                   |
| 81-120                            | 75           | 13.66 | 44      | 14.92 | 31      | 12.30 |                                                   |
| 121-160                           | 42           | 7.65  | 24      | 8.14  | 18      | 7.14  |                                                   |
| >160                              | 144          | 26.23 | 77      | 26.10 | 66      | 26.19 |                                                   |
| PSYCHOSOCIAL FACTORS              |              |       |         |       |         |       |                                                   |
| History of mental health problems |              |       |         |       |         |       |                                                   |
| No                                | 902          | 95.0  | 449     | 94.3  | 449     | 95.5  | 0.71                                              |
| Yes                               | 48           | 5.1   | 27      | 5.7   | 21      | 4.5   |                                                   |
| Sexual orientation                |              |       |         |       |         |       |                                                   |
| Heterosexual                      | 756          | 77.9  | 380     | 78.0  | 376     | 78.5  | 0.03                                              |
| Non-heterosexual                  | 214          | 22.1  | 107     | 22.0  | 103     | 21.5  |                                                   |
| Intimate partner violence         |              |       |         |       |         |       |                                                   |
| 0                                 | 674          | 69.5  | 362     | 74.3  | 311     | 64.9  | 15.93**                                           |
| 1                                 | 106          | 10.9  | 49      | 10.1  | 57      | 11.9  |                                                   |
| 2                                 | 117          | 12.1  | 52      | 10.7  | 63      | 13.2  |                                                   |
| 3                                 | 39           | 4.0   | 16      | 3.3   | 22      | 4.6   |                                                   |
| 4                                 | 34           | 3.5   | 8       | 1.6   | 26      | 5.4   |                                                   |

|                                                           |      |      |      |      |      |      |                      |
|-----------------------------------------------------------|------|------|------|------|------|------|----------------------|
| <b>Perceived social support (Median and IQR)</b>          | 39.0 | 32.0 | 36.0 | 31.0 | 43.0 | 31.0 | 4.90*** <sup>b</sup> |
| <b>Anxiety symptoms (Mean and SD)</b>                     | 15.8 | 4.50 | 15.6 | 4.71 | 16.0 | 4.28 | 1.31 <sup>a</sup>    |
| <b>Depressive symptoms (Mean and SD)</b>                  | 14.8 | 3.55 | 14.6 | 3.53 | 15.0 | 3.56 | 2.00* <sup>a</sup>   |
| <b>COVID-19 RELATED VARIABLES</b>                         |      |      |      |      |      |      |                      |
| <b>Tested positive for COVID-19</b>                       |      |      |      |      |      |      |                      |
| No                                                        | 923  | 95.2 | 458  | 94.1 | 461  | 96.2 | 2.52                 |
| Yes                                                       | 47   | 4.9  | 29   | 6.0  | 18   | 3.8  |                      |
| <b>COVID-19 symptoms</b>                                  |      |      |      |      |      |      |                      |
| No                                                        | 848  | 87.4 | 423  | 86.9 | 423  | 88.3 | 0.47                 |
| Yes                                                       | 122  | 12.6 | 64   | 13.1 | 56   | 11.7 |                      |
| <b>Other medical conditions</b>                           |      |      |      |      |      |      |                      |
| No                                                        | 928  | 95.7 | 460  | 94.5 | 464  | 96.9 | 3.38 <sup>†</sup>    |
| Yes                                                       | 42   | 4.3  | 27   | 5.5  | 15   | 3.1  |                      |
| <b>Self-isolation for COVID -19</b>                       |      |      |      |      |      |      |                      |
| <b>Symptoms</b>                                           |      |      |      |      |      |      |                      |
| No                                                        | 842  | 86.8 | 425  | 87.3 | 415  | 86.6 | 0.08                 |
| Yes                                                       | 128  | 13.2 | 62   | 12.7 | 64   | 13.4 |                      |
| <b>Having friend who had COVID-19</b>                     |      |      |      |      |      |      |                      |
| No                                                        | 819  | 84.4 | 407  | 84.2 | 407  | 85.0 | 0.11                 |
| Yes                                                       | 151  | 15.6 | 77   | 15.0 | 72   | 15.0 |                      |
| <b>Knowing someone who died from COVID-19 infection</b>   |      |      |      |      |      |      |                      |
| No                                                        | 798  | 82.3 | 406  | 83.4 | 389  | 81.2 | 0.77                 |
| Yes                                                       | 172  | 17.7 | 81   | 16.6 | 90   | 18.8 |                      |
| <b>Worry about COVID-19 infection (n=952)</b>             |      |      |      |      |      |      |                      |
| Not worried at all                                        | 228  | 24.0 | 165  | 34.5 | 63   | 13.4 | 60.42***             |
| Slightly worried                                          | 234  | 24.6 | 106  | 22.1 | 124  | 26.4 |                      |
| Somewhat worried                                          | 173  | 18.2 | 74   | 15.5 | 99   | 21.1 |                      |
| Moderately worried                                        | 193  | 20.3 | 75   | 15.7 | 118  | 25.2 |                      |
| Extremely worried                                         | 124  | 13.0 | 59   | 12.3 | 65   | 13.9 |                      |
| <b>Worry COVID-19 infection in family members (n=965)</b> |      |      |      |      |      |      |                      |
| Not worried at all                                        | 172  | 17.8 | 121  | 24.9 | 51   | 10.8 | 48.00***             |
| Slightly worried                                          | 223  | 23.1 | 120  | 24.6 | 101  | 21.3 |                      |
| Somewhat worried                                          | 162  | 16.8 | 74   | 15.2 | 87   | 18.4 |                      |
| Moderately worried                                        | 181  | 18.8 | 63   | 12.9 | 118  | 25.0 |                      |
| Extremely worried                                         | 227  | 23.5 | 109  | 22.4 | 117  | 24.7 |                      |
| <b>COVID-19 pandemic perceived as threat to income</b>    |      |      |      |      |      |      |                      |
| Strongly disagree                                         | 105  | 10.8 | 68   | 14.0 | 37   | 7.7  | 14.55**              |
| Slightly disagree                                         | 174  | 17.9 | 82   | 16.8 | 90   | 18.8 |                      |
| Neutral                                                   | 183  | 18.9 | 102  | 20.9 | 81   | 16.9 |                      |
| Slightly agree                                            | 213  | 22.0 | 97   | 19.9 | 116  | 24.2 |                      |
| Strongly agree                                            | 295  | 30.4 | 138  | 28.3 | 155  | 32.4 |                      |
| <b>Feeling isolated during lockdown</b>                   |      |      |      |      |      |      |                      |
| Strongly disagree                                         | 127  | 13.1 | 72   | 14.8 | 55   | 11.5 | 5.74                 |
| Slightly disagree                                         | 208  | 21.4 | 99   | 20.3 | 106  | 22.1 |                      |
| Neutral                                                   | 233  | 24.0 | 123  | 25.3 | 109  | 22.8 |                      |
| Slightly agree                                            | 249  | 25.7 | 113  | 23.2 | 136  | 28.4 |                      |
| Strongly agree                                            | 153  | 15.8 | 80   | 16.4 | 73   | 15.2 |                      |
| <b>Disruption from COVID-19 pandemic (Median and IQR)</b> | 34.0 | 27.0 | 36.0 | 27.0 | 32.0 | 26.0 | 2.37* <sup>b</sup>   |

<sup>a</sup>T-test, <sup>b</sup>Wilcoxon rank sum test; <sup>†</sup> $p < 0.1$ ; \* $p < 0.05$ ; \*\* $p < 0.01$ ; \*\*\* $p < 0.001$

Five percent of the participants reported having experienced mental health problems prior to the COVID-19 pandemic and 22% indicated being non-heterosexual, there were no sex differences in these proportions. Thirty percent of the participants had experienced at

least one form of intimate partner violence and this was significantly higher among women compared to men ( $\chi^2 = 15.93$ ;  $p < 0.01$ ). The mean anxiety symptom scores were comparable in men and women while depressive symptom and perceived support scores were significantly higher in women compared to men ( $t = 2.00$ ,  $p > 0.05$ ; Wilcoxon rank sum coefficient = 4.90,  $p < 0.001$  respectively).

About 5% of the participants reported testing positive for COVID-19 infection while 12.6% had experienced COVID-19 symptoms, 4% had COVID-19 risk conditions, 13.2% had had to self-isolate because of COVID-19 symptoms, 15.6% reported having friends who had tested positive for COVID-19 infection, 17.7% knew someone who had died from COVID-19 infection and these rates were comparable in men and women. However, compared to men, women were significantly more worried about themselves and family members getting infected with the COVID-19 ( $\chi^2 = 60.42$  and 48.00 respectively;  $p < 0.001$ ) and were more likely to see the pandemic as a threat to income ( $\chi^2 = 14.55$ ;  $p < 0.01$ ). In contrast, men reported higher disruption from the pandemic compared to women (Wilcoxon rank sum coefficient = 2.34,  $p < 0.05$ ).

## Univariate associations

### Anxiety symptoms

Of the socio-demographic variables, being employed was associated with significantly less anxiety symptoms compared to those who were unemployed/retired ( $\beta = -1.03$ , 95% CI: -3.17, -0.16) and earning a higher income was associated with lower anxiety symptoms in the whole sample (Table 2). Among male participants, higher age was significantly associated with higher anxiety symptoms ( $\beta = 0.04$ , 95% CI: 0.01, 0.08) while higher educational qualifications were associated with lower anxiety symptoms. Among females participants, lower age ( $\beta = -0.06$ , 95% CI: -0.10, -0.01), being married ( $\beta = -1.33$ ,

95% CI: -2.19, -0.48) and being employed ( $\beta = -2.01$ , 95% CI: -3.15, -0.86) were significantly associated with lower anxiety scores.

**Table 2: Univariate associations between Anxiety symptoms and Predictors**

| Predictor variables                             | Total              |              |       | Male               |              |       | Female            |              |       |
|-------------------------------------------------|--------------------|--------------|-------|--------------------|--------------|-------|-------------------|--------------|-------|
|                                                 | Coef               | 95% CI       | Beta  | Coef               | 95% CI       | Beta  | Coef              | 95% CI       | Beta  |
| <b>SOCIO-DEMOGRAPHIC FACTORS</b>                |                    |              |       |                    |              |       |                   |              |       |
| Age                                             | 0.00               | -0.28, 0.29  | 0.00  | 0.04*              | 0.01, 0.08   | 0.10  | -0.06*            | -0.10, -0.01 | -0.11 |
| Education (Ref=No qualifications)               |                    |              |       |                    |              |       |                   |              |       |
| Primary School                                  | 0.71               | -1.97, 3.40  | 0.02  | 0.65               | -2.80, 4.10  | 0.02  | -5.13             | -4.54, 4.54  | 0.00  |
| Vocational and equivalents                      | 1.08               | -1.15, 3.31  | 0.06  | 0.30               | -2.48, 3.08  | 0.02  | 1.36              | -2.75, 5.46  | 0.05  |
| Secondary school                                | -1.83 <sup>†</sup> | -3.90, 0.25  | -0.13 | -3.24*             | -5.97, -0.51 | -0.20 | -0.66             | -4.25, 2.94  | -0.05 |
| University                                      | -1.89 <sup>†</sup> | -3.81, 0.04  | -0.17 | -3.39 <sup>†</sup> | -5.83, -0.96 | -0.30 | -0.55             | -4.01, 2.91  | -0.05 |
| Marital status (Ref=Single)                     |                    |              |       |                    |              |       |                   |              |       |
| Married                                         | -0.24              | -0.85, 0.36  | -0.03 | 0.74 <sup>†</sup>  | -0.11, 1.60  | 0.08  | -1.33*            | -2.19, -0.48 | -0.14 |
| Divorced, Separated or Widowed                  | 0.96               | -0.48, 2.41  | 0.04  | 1.80               | -0.57, 4.18  | 0.07  | 0.32              | -0.57, 4.18  | 0.02  |
| Employment status (Ref=Unemployed/Retired)      |                    |              |       |                    |              |       |                   |              |       |
| Student                                         | -0.01              | -0.95, 0.93  | 0.00  | 0.35               | -1.11, 1.81  | 0.03  | -0.40             | -1.61, 0.82  | -0.04 |
| Employed                                        | -1.02*             | -1.89, -0.16 | -0.11 | -0.02              | -1.32, 1.28  | 0.00  | -2.01**           | -3.15, -0.86 | -0.23 |
| Income (€1,000; Ref: <40)                       |                    |              |       |                    |              |       |                   |              |       |
| 41-80                                           | 0.22               | -0.82, 1.26  | 0.02  | 0.09               | -1.37, 1.54  | 0.01  | 0.28              | -1.17, 1.73  | 0.03  |
| 81-120                                          | -1.04              | -2.32, 0.25  | -0.08 | -2.20              | -3.94, -0.46 | -0.17 | 0.26              | -1.61, 2.13  | 0.02  |
| 121-160                                         | -1.62*             | -3.17, -1.03 | -0.10 | -2.35*             | -4.45, -0.24 | -0.14 | -0.93             | -3.19, 1.33  | -0.06 |
| >160                                            | -2.11***           | -3.20, -1.03 | -0.21 | -3.98***           | -5.50, -2.47 | -0.37 | -0.11             | -1.63, 1.42  | -0.01 |
| <b>PSYCHOSOCIAL FACTORS</b>                     |                    |              |       |                    |              |       |                   |              |       |
| History of mental health problems (Ref=No)      | 2.09**             | 0.79, 3.39   | 0.10  | 2.14*              | 0.32, 3.96   | 0.11  | 2.07*             | 0.20, 3.93   | 0.10  |
| Sexual orientation (Ref=Heterosexual)           | 0.72*              | 0.38, 1.40   | 0.07  | 0.28               | -0.73, 1.30  | 0.02  | 1.22*             | 0.29, 2.15   | 0.12  |
| Intimate partner violence                       | 0.89***            | 0.63, 1.15   | 0.21  | 1.03***            | 0.59, 1.48   | 0.20  | 0.77***           | 0.45, 1.09   | 0.21  |
| Perceived social support                        | -0.10***           | -0.11, -0.08 | -0.37 | -0.11***           | -0.14, -0.09 | -0.41 | -0.09***          | -0.11, -0.07 | -0.35 |
| <b>COVID-RELATED FACTORS</b>                    |                    |              |       |                    |              |       |                   |              |       |
| Tested positive for COVID-19 (Ref=No)           | 2.61***            | 1.30, 3.92   | 0.12  | 3.29***            | 1.54, 5.04   | 0.17  | 1.66              | -0.35, 3.68  | 0.07  |
| COVID-19 symptoms (Ref=No)                      | 1.90***            | 1.05, 2.74   | 0.14  | 2.17*              | 0.94, 3.40   | 0.16  | 1.57*             | 0.38, 2.75   | 0.12  |
| Other medical conditions (Ref=No)               | 2.01**             | 0.62, 3.40   | 0.09  | 2.86**             | 1.05, 4.68   | 0.14  | 0.68              | -1.53, 2.88  | 0.03  |
| Self-isolation for COVID-19 (Ref=No)            | 1.71***            | 0.87, 2.54   | 0.13  | 1.90**             | 0.65, 2.15   | 0.13  | 1.50**            | 0.38, 2.62   | 0.12  |
| Having friend who had COVID-19 (Ref=No)         | -0.04              | -0.82, 0.74  | 0.00  | 0.27               | -0.88, 1.42  | 0.02  | -0.45             | -1.53, 0.62  | -0.04 |
| Knowing someone who died from COVID-19 (Ref=No) | 0.37               | -0.37, 1.11  | 0.03  | 0.44               | -0.68, 1.57  | 0.04  | 0.23              | -0.75, 1.22  | 0.02  |
| Worry about COVID-19 infection                  | 0.42***            | 0.21, 0.62   | 0.13  | 0.09               | -0.21, 0.39  | 0.03  | 0.80***           | 0.50, 1.10   | 0.24  |
| Worry COVID-19 infection in family members      | 0.17 <sup>†</sup>  | -0.03, 0.37  | 0.05  | -0.12              | -0.40, 0.16  | -0.04 | 0.53***           | 0.24, 0.81   | 0.16  |
| COVID-19 pandemic perceived as threat to income | -0.43***           | -0.64, -0.23 | -0.13 | -0.76***           | -1.06, -0.47 | -0.23 | -0.07             | -0.36, 0.22  | -0.03 |
| Feeling isolated during lockdown                | -0.14              | -0.36, 0.09  | -0.04 | -0.88***           | -1.19, -0.56 | -0.24 | 0.68***           | 0.38, 0.98   | 0.20  |
| Disruption from COVID-19 pandemic               | 0.00               | -0.02, 0.02  | 0.00  | -0.03 <sup>†</sup> | -0.06, 0.00  | -0.09 | 0.02 <sup>†</sup> | -0.00, 0.05  | 0.09  |

<sup>†</sup> $p < 0.1$ ; \* $p < 0.05$ ; \*\* $p < 0.01$ ; \*\*\* $p < 0.001$ ; Beta – standardized regression coefficient.

Previous diagnoses of mental health problems ( $\beta = 2.09$ , 95% CI: 0.79, 3.39), intimate partner violence ( $\beta = 0.89$ , 95% CI: 0.63, 1.15) and non-heterosexuality ( $\beta = 0.72$ , 95% CI: 0.38, 1.40) were significantly associated with higher anxiety symptoms while higher perceived social support was associated with lower anxiety symptoms in the whole sample ( $\beta$

= -0.10, 95% CI: -0.11, -0.08) and these effects were comparable in male and female participants.

COVID-19 related factors associated with higher anxiety symptoms included testing positive for COVID-19 ( $\beta = 2.61$ , 95% CI: 1.30, 3.92), having COVID-19 symptoms ( $\beta = 1.90$ , 95% CI: 1.05, 2.74), having other medical conditions ( $\beta = 2.01$ , 95% CI: 0.62, 3.40) and self-isolating due to COVID-19 symptoms ( $\beta$ s = 1.71; 95% CIs: 0.87, 2.54) with these associations being larger in men compared to women. The associations between worrying about COVID-19 infection – personally and for family members - and anxiety symptoms were larger in female ( $\beta$ s = 0.80 and 0.53; 95% CIs: 0.50, 1.10 and 0.24, 0.81 respectively) compared to male participants ( $\beta$ s = 0.09 and -0.12; 95% CIs: -0.21, 0.39 and -0.40, 0.16 respectively). While these differences were not statistically significant as indicated by overlapping confidence intervals, feeling isolated during the lockdown was significantly associated with lower anxiety symptoms in men ( $\beta = -0.88$ , 95% CI: -1.19, -0.56) and higher anxiety symptoms in women ( $\beta = 0.68$ , 95% CI: 0.38, 0.98).

## Depressive symptoms

Higher education and income were significantly associated with fewer depressive symptoms, as were being married ( $\beta = -0.57$ ; 95% CIs: -1.05, -0.10) and employed ( $\beta = -1.05$ ; 95% CIs: -1.74, -0.37; Table 3); and these effects were comparable in male and female participants.

**Table 3: Univariate associations between depressive symptoms and Predictors**

| Predictor variables                      | Total  |              |       | Male               |              |       | Female |              |       |
|------------------------------------------|--------|--------------|-------|--------------------|--------------|-------|--------|--------------|-------|
|                                          | Coef   | 95% CI       | Beta  | Coef               | 95% CI       | Beta  | Coef   | 95% CI       | Beta  |
| <b>SOCIO-DEMOGRAPHIC FACTORS</b>         |        |              |       |                    |              |       |        |              |       |
| <b>Age</b>                               | -0.03* | -0.05, 0.00  | -0.08 | -0.01              | -0.04, 0.02  | -0.04 | -0.04* | -0.08, 0.00  | -0.10 |
| <b>Education (Ref=No qualifications)</b> |        |              |       |                    |              |       |        |              |       |
| Primary School                           | -0.29  | -2.42, 1.85  | -0.01 | -1.30              | -3.93, 1.33  | -0.06 | 0.63   | -3.14, 4.39  | 0.02  |
| Vocational and equivalents               | -0.62  | -2.39, 1.15  | -0.04 | -1.44              | -3.56, 0.68  | -0.11 | 0.21   | -3.19, 3.62  | 0.01  |
| Secondary School                         | -1.66* | -3.31, -0.02 | -0.15 | -1.88 <sup>†</sup> | -3.97, 0.20  | -0.16 | -1.77  | -4.74, 1.21  | -0.17 |
| University                               | -2.02* | -3.55, -0.49 | -0.23 | -2.92*             | -4.78, -1.06 | -0.35 | -1.55  | -4.43, 1.32  | -0.17 |
| <b>Marital status (Ref=Single)</b>       |        |              |       |                    |              |       |        |              |       |
| Married                                  | -0.57* | -1.05, -0.10 | -0.08 | -0.26              | -0.91, 0.38  | -0.04 | -0.84* | -1.55, -0.12 | -0.11 |
| Divorced, Separated or Widowed           | 0.58   | -0.56, 1.71  | 0.03  | 0.66               | -1.13, 2.44  | 0.03  | 0.37   | -1.14, 1.87  | 0.02  |

|                                                 |                    |              |       |                   |              |       |                   |              |       |  |
|-------------------------------------------------|--------------------|--------------|-------|-------------------|--------------|-------|-------------------|--------------|-------|--|
| <b>Employment status</b>                        |                    |              |       |                   |              |       |                   |              |       |  |
| <b>(Ref=Unemployed/Retired)</b>                 |                    |              |       |                   |              |       |                   |              |       |  |
| Student                                         | -0.23              | -0.97, 0.51  | -0.03 | 0.11              | -0.98, 1.19  | 0.01  | -0.57             | -1.59, 0.45  | -0.07 |  |
| Employed                                        | -1.05**            | -1.74, -0.37 | -0.15 | -0.57             | -1.54, 0.40  | -0.08 | -1.50*            | -2.47, -0.54 | -0.21 |  |
| <b>Income (Ref=&lt;4000; Ref: &lt;40)</b>       |                    |              |       |                   |              |       |                   |              |       |  |
| 41-80                                           | 0.15               | -0.69, 0.99  | 0.02  | -0.12             | -1.27, 1.02  | -0.02 | 0.39              | -0.86, 1.64  | 0.05  |  |
| 81-120                                          | -0.53              | -1.56, 0.51  | -0.05 | -0.89             | -2.25, 0.48  | -0.09 | -0.13             | -1.74, 1.48  | -0.01 |  |
| 121-160                                         | -1.00              | -2.26, 0.25  | -0.07 | -1.29             | -2.94, 0.36  | -0.10 | -0.70             | -2.65, 1.24  | -0.05 |  |
| >160                                            | -1.43**            | -2.30, -0.55 | -0.18 | -2.28***          | -3.47, -1.09 | -0.28 | -0.51             | -1.82, 0.80  | -0.06 |  |
| <b>PSYCHOSOCIAL FACTORS</b>                     |                    |              |       |                   |              |       |                   |              |       |  |
| History of mental health problems (Ref=No)      | 2.27***            | 1.25, 3.28   | 0.14  | 1.69*             | 0.35, 3.03   | 0.11  | 3.07*             | 1.54, 4.61   | 0.18  |  |
| Sexual orientation (Ref=Heterosexual)           | 0.60*              | 0.06, 1.13   | 0.07  | 0.12              | -0.64, 0.88  | 0.01  | 1.09**            | 0.32, 1.87   | 0.13  |  |
| Intimate Partner Violence                       | 0.64***            | 0.44, 0.85   | 0.19  | 0.65***           | 0.31, 0.98   | 0.17  | 0.60***           | 0.34, 0.87   | 0.20  |  |
| Perceived Social Support                        | -0.07***           | -0.09, -0.06 | -0.36 | -0.08***          | -0.10, -0.06 | -0.39 | -0.08***          | -0.09, -0.06 | -0.36 |  |
| <b>COVID-RELATED FACTORS</b>                    |                    |              |       |                   |              |       |                   |              |       |  |
| Testing positive for Covid-19 (Ref=No)          | 0.48               | -0.56, 1.52  | 0.03  | 0.68              | -0.65, 2.01  | 0.05  | 0.32              | -1.36, 2.00  | 0.02  |  |
| COVID-19 symptoms (Ref=No)                      | 0.38               | -0.29, 1.06  | 0.04  | 0.51              | -0.42, 1.44  | 0.05  | 0.21              | -0.78, 1.21  | 0.02  |  |
| Other medical conditions (Ref=No)               | 0.98 <sup>†</sup>  | -1.11, 2.08  | 0.06  | 1.36 <sup>†</sup> | -0.01, 2.73  | 0.03  | 0.52              | -1.31, 2.36  | 0.09  |  |
| Self-isolation for COVID -19 symptoms (Ref=No)  | 0.70*              | 0.04, 1.36   | 0.07  | 0.51              | -0.43, 1.45  | 0.05  | 0.82 <sup>†</sup> | -0.12, 1.76  | 0.08  |  |
| Having friend who had COVID-19 (Ref=No)         | -0.56 <sup>†</sup> | -1.18, 0.06  | -0.06 | -0.91*            | -1.77, -0.05 | -0.09 | -0.24             | -1.14, 0.65  | -0.02 |  |
| Knowing someone who died from COVID-19 (Ref=No) | -0.34              | -0.93, 0.25  | -0.04 | -0.36             | -1.20, 0.49  | -0.04 | -0.39             | -1.21, 0.43  | -0.04 |  |
| Worry about COVID-19 infection                  | 0.24**             | 0.07, 0.40   | 0.09  | 0.08              | -0.15, 0.30  | 0.03  | 0.39*             | 0.13, 0.64   | 0.14  |  |
| Worry COVID-19 infection in family members      | 0.01               | -0.15, 0.16  | 0.00  | -0.12             | -0.33, 0.09  | -0.05 | 0.12              | -0.18, 0.36  | 0.05  |  |
| COVID-19 pandemic perceived as threat to income | -0.17*             | -0.33, 0.00  | -0.06 | -0.27*            | -0.49, -0.04 | -0.11 | -0.07             | -0.31, 0.17  | -0.03 |  |
| Feeling isolated during lockdown                | 0.29**             | 0.11, 0.46   | 0.10  | -0.14             | -0.38, 0.11  | -0.05 | 0.75***           | 0.51, 1.00   | 0.26  |  |
| Disruption from COVID 19 pandemic               | 0.01               | -0.01, 0.02  | 0.03  | -0.01             | -0.03, 0.01  | -0.05 | 0.02*             | 0.00, 0.05   | 0.10  |  |

†  $p < 0.1$ ; \*  $p < 0.05$ ; \*\*  $p < 0.01$ ; \*\*\*  $p < 0.001$ ; Beta – standardized regression coefficient.

Previous mental health problems, non-heterosexual sexual orientation and intimate partner violence were associated with higher depressive symptoms ( $\beta$ s = 2.27, 0.60 and 0.64, 95% CIs: 1.25, 3.28; 0.06, 1.13 and 0.44, 0.85 respectively) while perceived social support was associated with less depressive symptoms ( $\beta$  = -0.07, 95% CI: -0.09, -0.06). Although these effects were larger in women compared to men, these differences were not statistically significant.

Self-isolation due to COVID-19 symptoms, worry about getting infected and feeling isolated were associated with higher depressive symptoms ( $\beta$ s = 0.70, 0.24 and 0.29; 95% CIs: 0.04, 1.36, 0.07, 0.40 and 0.11, 0.46 respectively). However, though all effects appeared larger in women compared to men, these differences were not statistically different.

## Multivariate associations

## 274 Anxiety symptoms

275 Sociodemographic variables explained 6.1% of the variance in anxiety symptoms  
276 while female sex and lower levels of education were independently associated with higher  
277 anxiety symptoms (Table 4). None of the other sociodemographic variables were  
278 independently associated with anxiety symptoms in men and women, however, the direction  
279 of effects remained consistent. The variance explained by socio-demographic variables was  
280 larger in men compared to women (9.2% and 5.9% respectively).

281 **Table 4: Multivariate associations between Anxiety symptoms and Predictors**

| Predictor variables                                    | Total              |              |       | Male              |              |       | Female    |              |       |
|--------------------------------------------------------|--------------------|--------------|-------|-------------------|--------------|-------|-----------|--------------|-------|
|                                                        | Coef               | 95% CI       | Beta  | Coef              | 95% CI       | Beta  | Coef      | 95% CI       | Beta  |
| <b>SOCIO-DEMOGRAPHIC FACTORS</b>                       |                    |              |       |                   |              |       |           |              |       |
| ( $\Delta R^2$ in %)                                   | (6.1***)           |              |       | (9.2***)          |              |       | (5.9**)   |              |       |
| <b>Sex (Ref=Female)</b>                                |                    |              |       |                   |              |       |           |              |       |
| Male                                                   | -0.60*             | -1.15, -0.07 | -0.07 |                   |              |       |           |              |       |
| <b>Age</b>                                             | 0.00               | -0.04, 0.04  | -0.01 | -0.01             | -0.07, 0.04  | -0.03 | -0.04     | -0.09, 0.02  | -0.08 |
| <b>Education (Ref=No qualifications)</b>               |                    |              |       |                   |              |       |           |              |       |
| Primary School                                         | 0.14               | -2.38, 2.66  | 0.00  | 0.60              | -2.46, 3.66  | 0.02  | -0.27     | -4.84, 4.30  | -0.01 |
| Vocational and equivalents                             | 0.80               | -1.33, 2.93  | 0.04  | 1.13              | -1.40, 3.65  | 0.07  | -0.51     | -4.64, 3.61  | -0.02 |
| Secondary School                                       | -2.15*             | -4.18, -0.13 | -0.15 | -1.79             | -4.27, 0.69  | -0.11 | -1.47     | -5.27, 2.33  | -0.12 |
| University                                             | -1.62 <sup>†</sup> | -3.49, 0.26  | -0.15 | -1.80             | -4.02, 0.43  | -0.16 | -0.46     | -4.11, 3.18  | -0.04 |
| <b>Marital status (Ref=Single)</b>                     |                    |              |       |                   |              |       |           |              |       |
| Married                                                | -0.02              | -0.80, 0.77  | 0.00  | 0.54              | -0.59, 1.67  | 0.06  | 0.07      | -0.98, 1.13  | 0.01  |
| Divorced, Separated or Widowed                         | 0.58               | -0.92, 2.08  | 0.02  | 1.43              | -1.01, 3.86  | 0.05  | 0.84      | -0.95, 2.64  | 0.04  |
| <b>Employment status (Ref=Unemployed/Retired)</b>      |                    |              |       |                   |              |       |           |              |       |
| Student                                                | 0.69               | -0.24, 1.63  | 0.07  | 0.92              | -0.44, 2.28  | 0.08  | 0.23      | -1.00, 1.45  | 0.02  |
| Employed                                               | -0.64              | -1.46, 0.18  | -0.07 | 0.03              | -1.16, 1.22  | 0.00  | -1.17*    | -2.24, -0.09 | -0.14 |
| <b>PSYCHOSOCIAL FACTORS</b>                            |                    |              |       |                   |              |       |           |              |       |
| ( $\Delta R^2$ in %)                                   | (14.7***)          |              |       | (16.0***)         |              |       | (13.6***) |              |       |
| <b>History of mental health problems (Ref=No)</b>      | 0.47               | -0.73, 1.67  | 0.02  | 0.18              | -1.48, 1.84  | 0.01  | 0.40      | -1.34, 2.15  | 0.02  |
| <b>Sexual orientation (Ref=Heterosexual)</b>           | 0.45               | -0.20, 1.10  | 0.04  |                   |              |       | 0.33      | -0.54, 1.19  | 0.03  |
| <b>Intimate partner violence</b>                       | 0.33*              | 0.07, 0.59   | 0.08  | 0.38 <sup>†</sup> | -0.05, 0.80  | 0.07  | 0.37*     | 0.06, 0.68   | 0.10  |
| <b>Perceived social support</b>                        | -0.10***           | -0.11, -0.08 | -0.38 | -0.12***          | -0.14, -0.09 | -0.43 | -0.11***  | -0.13, -0.09 | -0.44 |
| <b>COVID-RELATED FACTORS</b>                           |                    |              |       |                   |              |       |           |              |       |
| ( $\Delta R^2$ in %)                                   | (5.0***)           |              |       | (6.1***)          |              |       | (11.8***) |              |       |
| <b>Tested positive for COVID-19 (Ref=No)</b>           | 0.39               | -1.16, 2.01  | 0.02  | 0.27              | -1.76, 2.30  | 0.01  |           |              |       |
| <b>Presence of COVID-19 symptoms (Ref=No)</b>          | 0.80 <sup>†</sup>  | -0.08, 1.95  | 0.06  | 1.33*             | 0.08, 2.59   | 0.09  | 0.62      | -0.54, 1.77  | 0.04  |
| <b>Other medical conditions (Ref=No)</b>               | 1.12               | -0.26, 2.50  | 0.05  | 1.12              | -0.71, 2.95  | 0.05  |           |              |       |
| <b>Self-isolation for COVID -19 symptoms (Ref=No)</b>  | 0.79 <sup>†</sup>  | -0.06, 1.64  | 0.06  | 0.85              | -0.37, 2.07  | 0.06  | 0.52      | -0.64, 1.67  | 0.04  |
| <b>Worry about COVID-19 infection</b>                  | 0.63***            | 0.35, 0.92   | 0.19  |                   |              |       | 0.69**    | 0.28, 1.10   | 0.20  |
| <b>Worry COVID-19 infection in family members</b>      | 0.10               | -0.18, 0.37  | 0.03  |                   |              |       | 0.07      | -0.31, 0.44  | 0.02  |
| <b>COVID-19 pandemic perceived as threat to income</b> | -0.20 <sup>†</sup> | -0.40, 0.01  | -0.06 | -0.19             | -0.49, 0.10  | -0.06 |           |              |       |
| <b>Feeling isolated during lockdown</b>                |                    |              |       | -0.43**           | -0.75, -0.12 | -0.12 | 0.50**    | 0.21, 0.78   | 0.15  |
| <b>Disruption from COVID 19 pandemic</b>               |                    |              |       | 0.06***           | 0.03, 0.09   | 0.18  | 0.04**    | 0.01, 0.07   | 0.14  |

282 <sup>†</sup> $p < 0.1$ ; \* $p < 0.05$ ; \*\* $p < 0.01$ ; \*\*\* $p < 0.001$ ; Beta – standardized regression coefficient.

283 Psychosocial factors explained the highest proportion of the variance in anxiety  
284 symptoms (14.7% in the whole sample, and 16.0% and 13.6% among men and women  
285 respectively). Of these variables, perceived social support was independently associated with  
286 lower anxiety while intimate partner violence was further associated with higher anxiety  
287 symptoms and this pattern was consistent in men and women.

288 COVID-19-related factors explained 5.0% of the variance in anxiety symptoms, with  
289 worry about infection emerging as the single independent predictor in the whole sample. The  
290 variance explained by COVID-19 related factors was larger in female (11.6%) compared to  
291 male participants (6.1%). Among men and women, disruption due to the pandemic was  
292 significantly associated with higher anxiety symptoms; however, while isolation was  
293 associated with fewer anxiety symptoms in men, it was associated with more anxiety  
294 symptoms on women. The presence of COVID-19 symptoms was further associated with  
295 more anxiety symptoms in men.

## 296 Depressive symptoms

297 Sociodemographic variables explained 4.4% of the variance in depressive symptoms  
298 (Table 5) which was comparable in men and women (4.5% and 5.3% respectively). Male sex  
299 and higher educational qualifications were independently associated with lower depressive  
300 symptoms.

301 **Table 5: Multivariate associations between depressive symptoms and Predictors**

| Predictor variables                      | Total    |              |       | Male   |              |       | Female             |             |       |
|------------------------------------------|----------|--------------|-------|--------|--------------|-------|--------------------|-------------|-------|
|                                          | Coef     | 95% CI       | Beta  | Coef   | 95% CI       | Beta  | Coef               | 95% CI      | Beta  |
| <b>SOCIO-DEMOGRAPHIC FACTORS</b>         |          |              |       |        |              |       |                    |             |       |
| ( $\Delta R^2$ in %)                     | (4.4***) |              |       | (4.5*) |              |       | (5.3**)            |             |       |
| <b>Sex (Ref=Female)</b>                  |          |              |       |        |              |       |                    |             |       |
| Male                                     | -0.59**  | -1.02, -0.16 | -0.08 |        |              |       |                    |             |       |
| <b>Age</b>                               | -0.02    | -0.05, 0.01  | -0.06 | -0.03  | -0.07, 0.02  | -0.08 | -0.04 <sup>†</sup> | -0.09, 0.00 | -0.11 |
| <b>Education (Ref=No qualifications)</b> |          |              |       |        |              |       |                    |             |       |
| Primary School                           | -0.52    | -2.51, 1.48  | -0.02 | -1.60  | -4.00, 0.80  | -0.08 | 1.31               | -2.47, 5.10 | 0.05  |
| Vocational and equivalents               | -0.80    | -2.48, 0.88  | -0.05 | -1.06  | -3.04, 0.93  | -0.08 | -0.39              | -3.85, 3.02 | -0.02 |
| Secondary School                         | -1.71*   | -3.31, -0.12 | -0.15 | -1.21  | -3.14, 0.73  | -0.10 | -1.31              | -3.61, 1.83 | -0.13 |
| University                               | -1.62*   | -3.10, -0.14 | -0.19 | -2.03* | -3.77, -0.29 | -0.25 | -0.53              | -4.43, 2.49 | -0.06 |
| <b>Marital status (Ref=Single)</b>       |          |              |       |        |              |       |                    |             |       |
| Married                                  | -0.08    | -0.69, 0.54  | -0.01 | -0.08  | -0.94, 0.82  | -0.01 | 0.24               | -0.63, 1.10 | 0.03  |
| Divorced, Separated or Widowed           | 0.79     | -0.39, 1.98  | -0.06 | -0.04  | -0.96, 2.99  | 0.05  | 0.91               | -0.57, 2.40 | 0.05  |



|                                                 |                   |              |       |           |              |       |                    |              |       |  |  |
|-------------------------------------------------|-------------------|--------------|-------|-----------|--------------|-------|--------------------|--------------|-------|--|--|
| <b>Employment status</b><br>(Ref=Unemployed)    |                   |              |       |           |              |       |                    |              |       |  |  |
| Student                                         | -0.01             | -0.79, 0.68  | 0.01  | -0.06     | -1.15, 0.98  | -0.01 | -0.18              | -1.18, 0.82  | -0.02 |  |  |
| Employed                                        | -0.45             | -1.09, 0.20  | -0.06 | -0.02     | -0.94, 0.89  | -0.01 | -0.78 <sup>†</sup> | -1.66, 0.10  | -0.11 |  |  |
| <b>PSYCHOSOCIAL FACTORS</b>                     |                   |              |       |           |              |       |                    |              |       |  |  |
| ( $\Delta R^2$ in %)                            | (15.5***)         |              |       | (17.0***) |              |       | (14.6***)          |              |       |  |  |
| History of mental health problems (Ref=No)      | 1.08*             | 0.14, 2.03   | 0.07  | 0.59      | -0.70, 1.88  | 0.04  | 1.46*              | 0.02, 2.90   | 0.08  |  |  |
| Sexual orientation (Ref=Heterosexual)           | 0.39              | -0.11, 0.90  | 0.05  |           |              |       | 0.47               | -0.23, 1.18  | 0.05  |  |  |
| Intimate partner violence                       | 0.26*             | 0.06, 0.46   | 0.08  | 0.45**    | 0.12, 0.78   | 0.12  | 0.25 <sup>†</sup>  | 0.00, 0.51   | 0.08  |  |  |
| Perceived social support                        | -0.08***          | -0.10, -0.07 | -0.41 | -0.08***  | -0.10, -0.06 | -0.38 | -0.09***           | -0.11, -0.07 | -0.45 |  |  |
| <b>COVID-RELATED FACTORS</b>                    |                   |              |       |           |              |       |                    |              |       |  |  |
| ( $\Delta R^2$ in %)                            | (5.0***)          |              |       | (0.8)     |              |       | (11.8***)          |              |       |  |  |
| Other medical conditions (Ref=No)               |                   |              |       | 1.41*     | 0.04, 2.77   | 0.09  |                    |              |       |  |  |
| Self-isolation for COVID -19 Symptoms (Ref=No)  | 0.57 <sup>†</sup> | -0.08, 1.22  | 0.05  |           |              |       | 0.17               | -0.74, 1.08  | 0.02  |  |  |
| Having friend who had COVID-19 (Ref=No)         | -0.61*            | -1.20, -0.01 | -0.06 | -0.60     | -1.46, 0.26  | -0.06 |                    |              |       |  |  |
| Worry about COVID-19 infection                  | 0.38***           | 0.22, 0.54   | 0.14  |           |              |       | 0.20               | -0.04, 0.44  | 0.07  |  |  |
| COVID-19 pandemic perceived as threat to income | -0.11             | -0.28, 0.05  | -0.04 | 0.05      | -0.17, 0.27  | 0.02  |                    |              |       |  |  |
| Feeling isolated during lockdown                | 0.44***           | 0.27, 0.57   | 0.16  |           |              |       | 0.67***            | 0.44, 0.91   | 0.24  |  |  |
| Disruption from COVID 19 pandemic               |                   |              |       |           |              |       | 0.05***            | 0.02, 0.07   | 0.19  |  |  |

302 <sup>†</sup>  $p < 0.1$ ; \* $p < 0.05$ ; \*\* $p < 0.01$ ; \*\*\* $p < 0.001$ ; Beta – standardized regression coefficient.

303 As with anxiety symptoms, the largest proportion of variance in depressive symptoms  
304 was explained by other psychosocial factors (15.6% in the whole sample, and 17.0% and  
305 14.6% in men and women respectively). In the whole sample and among men and women,  
306 perceived social support was independently associated with fewer depressive symptoms  
307 while intimate partner violence was associated with more depressive symptoms. In contrast to  
308 the finding with anxiety symptoms, previous history of psychiatric conditions remained an  
309 independent predictor of depressive symptoms with this effect being larger in women  
310 compared to men.

311 In the whole sample, COVID-19-related factors explained 4.5% of the variance in  
312 depressive symptoms of which worry about infection and feeling isolated during the  
313 lockdown were independently associated with increased depressive symptoms. In men, the  
314 proportion of variance explained was 0.8% with the presence of COVID-19-risk conditions  
315 being independently associated with depressive symptoms. For women, these group of  
316 symptoms accounted for a larger 11.8% of the variance in depressive symptoms with worry

about infection, isolation during lockdown and disruption due to the COVID pandemic emerging as independent predictors of depressive symptoms among them.

## Discussion

The present study aimed to investigate factors associated with anxiety and depressive symptoms during the COVID-19 pandemic, and to test for sex differences in these relationships. To the authors' knowledge, this is the first study to investigate these relationships among Nigerians. We demonstrated significant associations between sociodemographic, psychosocial and COVID-19 related factors and anxiety and depressive symptoms. The variances in anxiety and depressive symptoms explained by COVID-19-related factors were larger in women compared to men.

In contrast to the high global rates of COVID-19 infection [33, 34], only five percent of the sample reported testing positive while higher proportions reported either having had COVID-19 symptoms or self-isolating on account of these or knowing people who had tested positive or had died from COVID-19. These contrasting rates are consistent with the low rates of testing that have been described for COVID-19 in Nigeria [21, 35, 36] and suggest either a low uptake of testing by Nigerians or a limited capacity of testing services. The psychosocial burden of the pandemic was indicated by the large proportions of participants who indicated being worried about themselves or family members developing COVID-19, feeling isolated during the temporary lockdown instituted in Nigeria [37, 38] and who perceived the pandemic as a threat to their income [39]. While the rates of testing and presence of COVID-19 symptoms were comparable in male and female participants, women reported more worry about personal and family risk for COVID-19 infection and the impact of the lockdown on their incomes. This is consistent with previous findings [40] and may reflect the higher pre-pandemic risk for stress-related conditions in women [25, 41]. In contrast, men reported greater disruption in their lives due to the pandemic and this may be

understood in the context of the male participants in the present study being older and more likely to be married. They may, thus, be more sensitive to disruptions and consequent threats to their roles as breadwinners.

Consistent with findings from previous research [24, 25, 41], depressive and anxiety symptoms were significantly higher among female participants. These may reflect the impacts of higher levels of psychosocial stressors among women such as intimate partner violence or higher COVID-19-related concerns among them such as worry about infection [40].

### **Associations with anxiety and depressive symptoms**

Of the sociodemographic variables, being employed, higher income and higher education were associated with lower anxiety and depressive symptoms, suggesting that higher socioeconomic status may provide a buffer against economic uncertainties impacts during the COVID-19 pandemic [42-45].

Consistent with prior findings, previous mental illness [46], non-heterosexuality [10, 11] and intimate partner violence [8, 13] were individually associated with higher anxiety and depressive symptoms while perceived social support was associated with lower anxiety and depressive symptoms [18, 47]. Together, these variables explained the largest proportion of variance in both anxiety and depressive symptoms with intimate partner violence and perceived social support retaining independent associations with both symptoms. These suggest that the previously reported mental health disparities in Nigerian non-heterosexual compared with heterosexual men [11] may be partly explained by psychosocial disadvantages [48], although this needs to be specifically investigated. Prior mental illness was only independently associated with depressive symptoms and may reflect other mechanisms such as disruption in mental health services [21] or greater neurological vulnerability to stressors [46].

As have been previously demonstrated, most of the COVID-19-related factors including testing positive for COVID-19 infection, having COVID-19 symptoms, having to self-isolate, worry about getting infected were significantly associated with higher anxiety symptoms [1, 2]. In contrast, fewer factors were individually associated with depressive symptoms – increased isolation during lockdown and in the broader context of the pandemic, and concern about getting infected. However, the variance explained in both psychopathologies by COVID-19-related factors was comparable. The independent association between worry about infection and both anxiety and depressive symptoms after adjusting for sociodemographic and psychosocial factors indicates its significance as a stressor. Isolation during lockdown was further independently associated with increased depressive symptoms which is consistent with previous research [18]. The attenuation of the associations between the other COVID-19 factors and anxiety and depressive symptoms after adjusting for other socio-demographic and psychosocial risk and protective factors suggest that the mental health impacts of these pandemic-related factors may be partly explained by indirect effects through these processes. Thus, while neurotoxic effects of the virus have been suggested as a possible mechanism for psychopathology in the context of the COVID-19 pandemic [3, 4]; our findings suggest that alternative pathways including exacerbation of pre-existing psychosocial risks such as intimate partner violence victimization [49], increased minority stress among non-heterosexual Nigerians [21] and attenuation of protective factors such as social support may explain the associations between pandemic-related stressors and mental health problems; however, these need to be specifically tested.

An important sex difference was that COVID-19-related factors explained a larger proportion of the variance in anxiety and depressive symptoms in female compared to male participants. This was most marked for depressive symptoms in which the variance explained in male participants was very small and not statistically significant. This suggests that the

psychosocial risk and protective factors investigated in the present study respectively completely explain or mitigate the risk conferred by the COVID-19 pandemic in Nigerian men. In contrast, other mechanisms which were not investigated in the present study may further explain the associations between anxiety and depressive symptoms among women in Nigeria. These may include biological [25, 50] or social vulnerabilities [26] especially in low/middle income countries like Nigeria with high levels of gender inequality [27]. Alternatively, it is also possible that men react to stress with externalising behaviors such as substance misuse [24] which were not assessed in the present study.

## Conclusion

Our findings indicate that some psychosocial factors related to the COVID-19 pandemic including worry about infection, disruption due to the pandemic, and isolation during the lockdown are independently associated with higher depressive and anxiety symptoms. In contrast, higher education, being employed, higher income and higher perceived social support were associated with lower anxiety and depressive symptoms suggesting that higher socioeconomic status and social support may be protective against the uncertainties and adverse mental health impacts of the COVID-19 pandemic in Nigeria. Thus, improving social support can be potentially targeted as an intervention to minimize the adverse mental health impacts of the COVID-19 pandemic in resource-poor setting such as Nigeria, however, this needs to be tested using prospective and experimental designs. Such support may be better targeted at individuals from lower socioeconomic backgrounds. Similarly, women in Nigeria may benefit more from such interventions; however, more research is needed to identify other mechanisms of increased depressive and anxiety symptoms among them in the context of the COVID-19 pandemic.

## Limitations

416 In interpreting our findings, the following limitations should be considered: the online  
 417 nature of survey may have limited representativeness of the sample, for example, individuals  
 418 with higher levels of education were over-represented, as were Yorubas who reside in  
 419 southwestern Nigeria. Although this may limit the generalizability of our findings, the better  
 420 socioeconomic indices including higher education and average income in South-Western  
 421 Nigeria [51] may mean that the associations between COVID-19-related factors and anxiety  
 422 and depressive are underestimated in our study. The cross-sectional nature of the study also  
 423 means that our findings cannot be extended to explain causal mechanisms which would need  
 424 to be investigated using prospective or experimental designs.

## References

1. Bergman YS, Cohen-Fridel S, Shrira A, Bodner E, Palgi Y. COVID-19 health worries and anxiety symptoms among older adults: the moderating role of ageism. *Int Psychogeriatr*. 2020 Jun 17. doi: 10.1017/S1041610220001258, PubMed PMID: 32613924, PubMed Central PMCID: PMC7348214.
2. Rossi R, Socci V, Talevi D, Mensi S, Nioi C, Pacitti F, et al. COVID-19 pandemic and lockdown measures impact on mental health among the general population in Italy. *Front Psychiatry*. 2020 Aug 17. doi: 10.3389/fpsyt.2020.00790, Pubmed PMID: 32848952, PubMed Central PMCID: PMC7426501.
3. Lynch D, O'brien M, O'byrne L, Gavin B, McNicholas F. Impact and Mechanism of Covid-19 on Mental Health and Wellbeing. *Ir Med J*. 2020 Jun 11;113(6):100. PubMed PMID: 32816435.
4. Ye M, Ren Y, Lv T. Encephalitis as a clinical manifestation of COVID-19. *Brain Behav Immun*. 2020 Aug;88:945-946. doi: 10.1016/j.bbi.2020.04.017, PubMed PMID: 32283294, PubMed Central PMCID: PMC7146652.
5. Gruber J, Prinstein MJ, Clark LA, Rottenberg J, Abramowitz JS, Albano AM, et al. Mental health and clinical psychological science in the time of COVID-19: Challenges, opportunities, and a call to action. *Am Psychol*. 2020 Aug 10. doi: 10.1037/amp0000707, PubMed PMID: 32772538.
6. Agüero JM. Covid-19 and the rise of intimate partner violence. *World Dev*. 2021 Jan;137:105217. doi: 10.1016/j.worlddev.2020.105217, PubMed PMID: 33012955, PubMed Central PMCID: PMC7522673.

- 447 7. Evans ML, Lindauer M, Farrell ME. A Pandemic within a Pandemic—Intimate Partner  
448 Violence during Covid-19. *N Engl J Med*. 2020 Sep 16. doi: 10.1056/NEJMp2024046,  
449 PubMed PMID: 32937063.
- 450 8. Spencer C, Mallory AB, Cafferky BM, Kimmes JG, Beck AR, Stith SM. Mental health  
451 factors and intimate partner violence perpetration and victimization: A meta-analysis.  
452 *Psychology of Violence*. 2019;9(1):1-17. doi: 10.1037/vio0000156.
- 453 9. King M, Semlyen J, Tai SS, Killaspy H, Osborn D, Popelyuk D, et al. A systematic  
454 review of mental disorder, suicide, and deliberate self harm in lesbian, gay and bisexual  
455 people. *BMC Psychiatry*. 2008 Aug 18;8:70. doi: 10.1186/1471-244X-8-70, PubMed  
456 PMID: 18706118, PubMed Central PMCID: PMC2533652.
- 457 10. Plöderl M, Tremblay P. Mental health of sexual minorities. A systematic review. *Int*  
458 *Rev Psychiatry*. 2015;27(5):367-85. doi: 10.3109/09540261.2015.1083949, PubMed  
459 PMID: 26552495.
- 460 11. Oginni OA, Mosaku KS, Mapayi BM, Akinsulore A, Afolabi TO. Depression and  
461 associated factors among gay and heterosexual male university students in Nigeria.  
462 *Arch Sex Behav*. 2018 May;47(4):1119-1132. doi: 10.1007/s10508-017-0987-4,  
463 PubMed PMID: 28466230.
- 464 12. Fish JN, McInroy LB, Paceley MS, Williams ND, Henderson S, Levine DS, et al. “I’m  
465 Kinda Stuck at Home With Unsupportive Parents Right Now”: LGBTQ Youths’  
466 Experiences With COVID-19 and the Importance of Online Support. *J Adolesc Health*.  
467 2020 Sep;67(3):450-452. doi: 10.1016/j.jadohealth.2020.06.002, PubMed PMID:  
468 32591304, PubMed Central PMCID: PMC7309741.
- 469 13. Adebawale O, James B. The association between intimate partner violence, psychiatric  
470 morbidity amongst pregnant women and partner alcohol use in southern Nigeria. *Afr J*  
471 *Prim Health Care Fam Med*. 2020;12(1):1-7. doi: 10.4102/phcfm.v12i1.2226.



- 472 14. Mapayi B, Makanjuola R, Mosaku S, Adewuya O, Afolabi O, Aloba O, et al. Impact of  
473 intimate partner violence on anxiety and depression amongst women in Ile-Ife, Nigeria.  
474 Arch Womens Ment Health. 2013 Feb;16(1):11-8. doi: 10.1007/s00737-012-0307-x,  
475 PubMed PMID: 22936117.
- 476 15. Adegoke T. Geriatric depression, health status and loneliness influencing psychosocial  
477 well-being of elderly persons from selected households in Ibadan, Nigeria. Gender  
478 Behaviour. 2014;12(1):6256-6264.
- 479 16. Demyttenaere K, Bruffaerts R, Posada-Villa J, Gasquet I, Kovess V, Lepine JP, et al.  
480 Prevalence, severity, and unmet need for treatment of mental disorders in the World  
481 Health Organization World Mental Health Surveys. JAMA. 2004 Jun 2;291(21):2581-  
482 90. doi: 10.1001/jama.291.21.2581, PubMed PMID: 15173149.
- 483 17. Abdulmalik J, Olayiwola S, Docrat S, Lund C, Chisholm D, Gureje O. Sustainable  
484 financing mechanisms for strengthening mental health systems in Nigeria. Int J Ment  
485 Health Syst. 2019 May 31;13:38. doi: 10.1186/s13033-019-0293-8, PubMed PMID:  
486 31164918, PubMed Central PMCID: PMC6543636.
- 487 18. Wang J, Mann F, Lloyd-Evans B, Ma R, Johnson S. Associations between loneliness  
488 and perceived social support and outcomes of mental health problems: A systematic  
489 review. BMC Psychiatry. 2018 May 29;18(1):156. doi: 10.1186/s12888-018-1736-5,  
490 PubMed PMID: 29843662, PubMed Central PMCID: PMC5975705.
- 491 19. British Broadcasting Corporation. United Kingdom: Covid: Rishi Sunak to extend  
492 furlough scheme to end of March [cited 2020 Nov 25] BBC. Available from:  
493 <https://www.bbc.co.uk/news/business-54824120>
- 494 20. British Broadcasting Corporation. United Kingdom: Coronavirus: UK government  
495 unveils aid for self-employed [cited 2020 Nov 25] BBC. Available from:  
496 <https://www.bbc.co.uk/news/uk-52053914>

- 497 21. Oginni OA, Amiola A, Adelola A, Uchendu U. A commentary on the Nigerian  
498 response to the COVID-19 pandemic. Psychol Trauma. 2020 Jun 11. doi:  
499 10.1037/tra0000743, PMID: 32525389.
- 500 22. Ejiogu A, Okechukwu O, Ejiogu C. Nigerian budgetary response to the COVID-19  
501 pandemic and its shrinking fiscal space: Financial sustainability, employment, social  
502 inequality and business implications. J. Public Budg. Account. Financial Manag. 2020  
503 Sep 15;32(5):919-928. doi: 10.1108/JPBAFM-07-2020-0101
- 504 23. Ozili PK. Covid-19 pandemic and economic crisis: The Nigerian experience and  
505 structural causes. SSRN [Preprint]. 2020 [cited 2020 Dec 7]. Available from:  
506 <http://dx.doi.org/10.2139/ssrn.3567419>
- 507 24. Steel Z, Marnane C, Iranpour C, Chey T, Jackson JW, Patel V, et al. The global  
508 prevalence of common mental disorders: a systematic review and meta-analysis 1980–  
509 2013. Int J Epidemiol. 2014 Apr;43(2):476-93. doi: 10.1093/ije/dyu038, PubMed  
510 PMID: 24648481, PubMed Central PMCID: PMC3997379.
- 511 25. Bangasser DA, Valentino RJ. Sex differences in stress-related psychiatric disorders:  
512 neurobiological perspectives. Front Neuroendocrinol. 2014 Aug;35(3):303-19. doi:  
513 10.1016/j.yfrne.2014.03.008, PubMed PMID: 24726661, PubMed Central PMCID:  
514 PMC4087049.
- 515 26. Weissman MM, Klerman GL. Sex differences and the epidemiology of depression.  
516 Arch Gen Psychiatry. 1977 Jan;34(1):98-111. doi:  
517 10.1001/archpsyc.1977.01770130100011, PubMed PMID: 319772.
- 518 27. Okojie CE. Gender inequalities of health in the third world. Soc Sci Med. 1994  
519 Nov;39(9):1237-47. doi: 10.1016/0277-9536(94)90356-5, PubMed PMID: 7801161.
- 520 28. Rivera C, Hsu Y-C, Esbry FP, Dugarova E. Gender Inequality and the Covid-19 Crisis:  
521 A Human Development Perspective [Internet]. New York: United Nations

522 Development Programme; 2020. Available from:  
523 [http://hdr.undp.org/sites/default/files/covid-19\\_and\\_human\\_development -](http://hdr.undp.org/sites/default/files/covid-19_and_human_development_-_gender_dashboards_final.pdf)  
524 [\\_gender\\_dashboards\\_final.pdf](http://hdr.undp.org/sites/default/files/covid-19_and_human_development_-_gender_dashboards_final.pdf)

525 29. Sohal H, Eldridge S, Feder G. The sensitivity and specificity of four questions (HARK)  
526 to identify intimate partner violence: a diagnostic accuracy study in general practice.  
527 BMC Fam Pract. 2007 Aug 29;8:49. doi: 10.1186/1471-2296-8-49, PubMed PMID:  
528 17727730, PubMed Central PMCID: PMC2034562.

529 30. Zimet GD, Dahlem NW, Zimet SG, Farley GK. The multidimensional scale of  
530 perceived social support. J Pers Assess. 1988;52(1):30-41. doi:  
531 10.1207/s15327752jpa5201\_2

532 31. White RG, Van Der Boer C. Impact of the COVID-19 pandemic and initial period of  
533 lockdown on the mental health and well-being of adults in the UK. BJPsych Open.  
534 2020 Aug 17;6(5):e90. doi: 10.1192/bjo.2020.79, PubMed PMID: 32799958, PubMed  
535 Central PMCID: PMC7431844.

536 32. Zigmond AS, Snaith RP. The hospital anxiety and depression scale. Acta Psychiatr  
537 Scand. 1983 Jun;67(6):361-70. doi: 10.1111/j.1600-0447.1983.tb09716.x, PubMed  
538 PMID: 6880820.

539 33. European Centre for Disease Prevention and Control COVID-19 situation update  
540 worldwide as of 7 December 2020 [Internet]. Solna: European Centre for Disease  
541 Prevention and Control; 2020 [cited 2020 Dec 7]. Available from:  
542 <https://guides.library.uwa.edu.au/c.php?g=324981&p=2178449>

543 34. Coronavirus Resource Center. Tracking: Follow global cases and trends [Internet].  
544 Maryland: Johns Hopkins University of Medicine; 2020 [cited Dec7]. Available from:  
545 <https://coronavirus.jhu.edu/map.html>

- 546 35. Nigeria Centre for Disease Control. COVID-19 Nigeria [Internet]. Abuja: Nigeria  
547 Centre for Disease Control; 2020 [cited Dec 7]. Available from:  
548 <https://covid19.ncdc.gov.ng/>
- 549 36. Mbow M, Lell B, Jochems SP, Cisse B, Mboup S, Dewals BG, et al. COVID-19 in  
550 Africa: Dampening the storm? Science. 2020 Aug 7;369(6504):624-626. doi:  
551 10.1126/science.abd3902, PubMed PMID: 32764055.
- 552 37. Brooks SK, Webster RK, Smith LE, Woodland L, Wessely S, Greenberg N, et al. The  
553 psychological impact of quarantine and how to reduce it: rapid review of the evidence.  
554 Lancet. 2020 Mar 14;395(10227):912-920. doi: 10.1016/S0140-6736(20)30460-8,  
555 PubMed PMID: 32112714, PubMed Central PMCID: PMC7158942.
- 556 38. Dubey S, Biswas P, Ghosh R, Chatterjee S, Dubey MJ, Chatterjee S, et al. Psychosocial  
557 impact of COVID-19. Diabetes Metab Syndr. Sep-Oct 2020;14(5):779-788. doi:  
558 10.1016/j.dsx.2020.05.035, PubMed PMID: 32526627, PubMed Central PMCID:  
559 PMC7255207.
- 560 39. Chetty R, Friedman J, Hendren N, Stepner M. The economic impacts of COVID-19:  
561 Evidence from a new public database built from private sector data [Internet].  
562 Massachusetts: Opportunity Insights; 2020 [cited Dec 7]. NBER working paper No.  
563 27431. Available from: <https://opportunityinsights.org/paper/tracker/>
- 564 40. Song K, Xu R, Stratton TD, Kavcic V, Luo D, Hou F, Bi F, Jiao R, Yan S, Jiang Y. Sex  
565 differences and Psychological Stress: Responses to the COVID-19 epidemic in China.  
566 BMC Public Health [Preprint]. 2020 [cited Dec 7]. Available from:  
567 <https://www.researchsquare.com/article/rs-42213/v1>. doi: 10.21203/rs.3.rs-42213/v1
- 568 41. McLean CP, Asnaani A, Litz BT, Hofmann SG. Gender differences in anxiety  
569 disorders: prevalence, course of illness, comorbidity and burden of illness. J Psychiatr

- Res. 2011 Aug;45(8):1027-35. doi: 10.1016/j.jpsychires.2011.03.006, PubMed PMID: 21439576, PubMed Central PMCID: PMC3135672.
42. Brinker J, Cheruvu VK. Social and emotional support as a protective factor against current depression among individuals with adverse childhood experiences. *Prev Med Rep.* 2017 Mar 5; 5:127-33. doi: 10.1016/j.pmedr.2016.11.018, PubMed PMID: 27981026, PubMed Central PMCID: PMC5156603.
43. Verbeek T, Bockting CL, Beijers C, Meijer JL, van Pampus MG, Burger H. Low socioeconomic status increases effects of negative life events on antenatal anxiety and depression. *Women Birth.* 2019 Feb;32(1):e138-e143. doi: 10.1016/j.wombi.2018.05.005, PubMed PMID: 29887508.
44. Freeman A, Tyrovolas S, Koyanagi A, Chatterji S, Leonardi M, Ayuso-Mateos JL, et al. The role of socio-economic status in depression: results from the COURAGE (aging survey in Europe). *BMC Public Health.* 2016 Oct 19;16(1):1098. doi: 10.1186/s12889-016-3638-0, PubMed PMID: 27760538, PubMed Central PMCID: PMC5069819.
45. Sulyman D, Ayanda KA, Dattijo LM, Aminu BM. Postnatal depression and its associated factors among Northeastern Nigerian women. *Ann Trop Med Public Health.* 2016;9(3):184-190. doi: 10.4103/1755-6783.179099.
46. Kendler KS, Thornton LM, Gardner CO. Stressful life events and previous episodes in the etiology of major depression in women: an evaluation of the “kindling” hypothesis. *Am J Psychiatry.* 2000 Aug;157(8):1243-51. doi: 10.1176/appi.ajp.157.8.1243, PMID: 10910786.
47. Akintayo RO, Odunlami GJ, Bamidele OF, Fabiyi EP, Akintayo FC, Bamidele OV, et al. The impacts of state and trait anxiety as moderated by perceived social support among Nigerian patients with rheumatoid arthritis. *Reumatologia.* 2018;56(3):155-163.

594           doi: 10.5114/reum.2018.76903, PubMed PMID: 30042603, PubMed Central PMCID:  
595           PMC6052375.

596   48.   Okanlawon K, Adebowale AS, Titilayo A. Sexual hazards, life experiences and social  
597           circumstances among male sex workers in Nigeria. *Cult Health Sex.* 2013;15 Suppl:22-  
598           33. doi: 10.1080/13691058.2012.754053, PubMed PMID: 23252939.

599   49.   Hamadani JD, Hasan MI, Baldi AJ, Hossain SJ, Shiraji S, Bhuiyan MSA, et al.  
600           Immediate impact of stay-at-home orders to control COVID-19 transmission on  
601           socioeconomic conditions, food insecurity, mental health, and intimate partner violence  
602           in Bangladeshi women and their families: an interrupted time series. *Lancet Glob*  
603           *Health.* 2020 Nov;8(11):e1380-e1389. doi: 10.1016/S2214-109X(20)30366-1, PubMed  
604           PMID: 32857955, PubMed Central PMCID: PMC7447230.

605   50.   Donner NC, Lowry CA. Sex differences in anxiety and emotional behavior. *Pflugers*  
606           *Arch.* 2013 May;465(5):601-26. doi: 10.1007/s00424-013-1271-7, PubMed PMID:  
607           23588380, PubMed Central PMCID: PMC3805826.

608   51.   National Population Commission (NPF). Nigeria demographic and health survey 2018.  
609           Abuja, Nigeria and Rockville, Maryland, USA; 2019.

610
